# Supplementary material
Source: publisher site journal article supplement (https://cdn.bio-protocol.org/journal/static/5230_Supplementary%20information.docx)
Supplement: Supplementary file 1 [file 5230_Supplementary%20information.docx]

Supplementary information for Protocol for Screening Host-Targeting Antivirals (HTAs) Using Human PBMCs and pDCs

Zhao Xuan Low1, *, Osamu Kanauchi1, 2, Sazaly AbuBakar1, Vunjia Tiong1, 3 and Pouya Hassandarvish1

1Tropical Infectious Disease Research and Education Centre (TIDREC), Universiti Malaya, Kuala Lumpur, Malaysia

2Institute of Health Sciences, Kirin Holdings Co., Ltd., 2-26-1, Muraoka-Higashi, Fujisawa, Kanagawa, Japan

3Department of Biomedical Sciences, Faculty of Medicine, Universiti Malaya, Kuala Lumpur, Malaysia

*For correspondence: [lowzx95@gmail.com](mailto:lowzx95@gmail.com)

Table S1. The antiviral effect of recombinant IFN-α (100U), LCP Sup 1:10, and CpG Sup 1:10, were evaluated based on the log reduction normalized to Neg Sup 1:10 (median **± SD**) N=5. FFURA= Foci forming unit reduction assay, PFURA= Plaque forming unit reduction assay, IFN-α (100 U) = interferon alpha 100 units, CpG Sup 1:10 = 10-fold diluted supernatants of CpG ODN 2216-stimulated PBMC, LCP Sup 1:10= 10-fold diluted supernatants of LC-Plasma-stimulated PBMC, LCP Sup 1:100 = 100-fold diluted supernatants of LC-Plasma-stimulated PBMC, and LCP Sup 1:1,000 = 1000-fold diluted supernatants of LC-Plasma-stimulated PBMCs.

|  | **Anti-DENV** | | **Anti-CHIKV** | | **Anti-ZIKV** | |
| --- | --- | --- | --- | --- | --- | --- |
| **Treatment** | **No. of log reduction (FFURA)** | **No. of log reduction (qRT-PCR)** | **No. of log reduction (PFURA)** | **No. of log reduction (qRT-PCR)** | **No. of log reduction (PFURA)** | **No. of log reduction**  **(qRT-PCR)** |
| **IFN-α (100 U)** | **4.86 ± 0.77** | **2.95 ± 0.55** | **6.11 ± 0.97** | **4.49 ± 0.53** | **5.15 ± 1.27** | **3.34 ± 0.44** |
| **CpG Sup 1:10** | **5.63 ± 2.02** | **3.37 ± 0.88** | **6.48 ± 1.53** | **4.97 ± 0.32** | **3.95 ± 2.00** | **4.23 ± 0.74** |
| **LCP Sup 1:10** | **2.15 ± 0.67** | **1.50 ± 0.71** | **3.44 ± 2.36** | **2.76 ± 1.60** | **2.51 ± 0.64** | **1.53 ± 0.77** |
| **LCP Sup 1:100** | **0.99 ± 0.70** | **0.59 ± 0.22** | **1.15 ± 0.39** | **0.44 ± 0.33** | **2.00 ± 01.11** | **0.69 ± 0.47** |
| **LCP Sup 1:1,000** | **0.15 ± 0.43** | **0.18 ± 0.28** | **0.97 ± 0.59** | **0.34 ± 0.32** | **1.09 ± 1.22** | **0.40 ± 0.47** |

Table S2. Fold-increase in ISGs of Huh-7 cells following treatments with recombinant IFN-α (100 units), CpG Sup 1:10, and LCP Sup 1:10, (median ± SD) N=5

| **ISGs** | **Fold-increase in Interferon stimulative genes** | | | |
| --- | --- | --- | --- | --- |
| **IFN-α (100 U)** | **CpG Sup 1:10** | **LCP Sup 1:10** | **Neg Sup 1:10** |
| **IFITM-1** | **20.56 ± 8.86** | **15.43 ± 6.42** | **9.73 ± 5.87** | **1.31 ± 0.37** |
| **ISG15** | **77.3 ± 37.5** | **63.90 ± 51.00** | **10.5 ± 4.13** | **1.62 ± 0.62** |
| **ISG20** | **7.12 ± 5.82** | **5.54 ± 5.11** | **3.52 ± 1.18** | **1.21 ± 0.35** |
| **Mx-A** | **254.70 ± 45.80** | **278.0 ± 60.83** | **23.11 ± 63.14** | **1.160 ± 2.140** |
| **OAS-1** | **75.11 ± 42.44** | **60.25 ± 41.50** | **12.01 ± 16.14** | **1.69 ± 3.16** |
| **RSAD2** | **4486 ± 6115** | **2678 ± 5666** | **17.1 ± 69.1** | **0.58 ± 0.31** |
| **RYDEN** | **21.42 ± 24.74** | **23.92 ± 36.16** | **8.04 ± 4.80** | **1.930 ± 7.60** |
